# Supplementary material
Source: Springer Nature journal article supplement (https://www.springermedizin.de/resource/supplementary/40164_2013_65_MOESM3_ESM.pdf/9687108)

# Ingram *et al.* Additional File 3:

## Expression profiles for four ABC transporters that show highly significant medulloblastoma subtype associations.

Shown: ABC transporter family genes present in public dataset NCBI GEO GSE10327 (62 Medulloblastoma cases), with combinatorial subtype discrimination p-values <0.000001 (see analysis in Supplementary File 2). X-axis scale = Affymetrix data signal strength value.

Group names are as in Kool *et al.*, 2008. (Group A = WNT associated, Group B = SHH associated, while Group C + Group D = Group 4 and Group E = Group 3 in consensus nomenclature of Taylor *et al.* 2012)

### Probeset 204719\_at: ABCA8

Adj. p-value for discrimination of tumors of group B from ACDE = 0.00000003

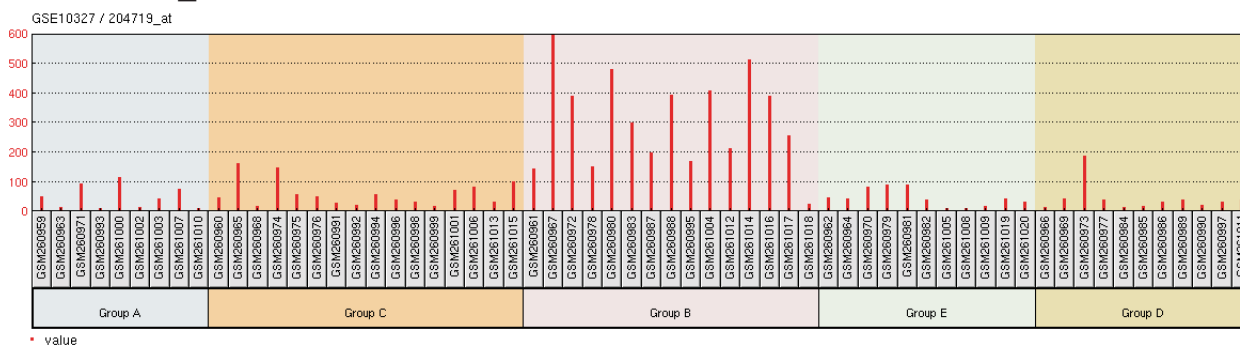

### Probeset 210246\_s\_at: ABCC8

Adj. p-value for discrimination of tumours of group B from ACDE = 0.000000022

Adj. p-value for discrimination of tumours of group BE from ACD = 0.000000006

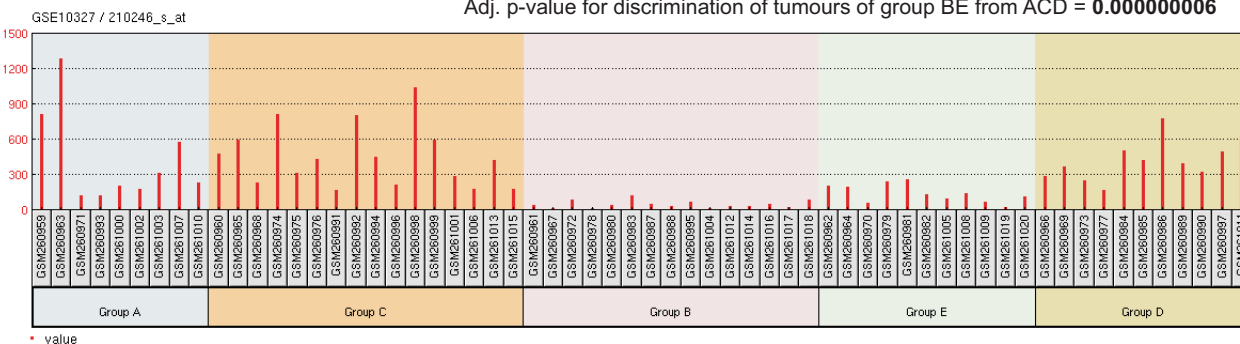

### Probeset 207583\_at: ABCD2

Adj. p-value for discrimination of tumours of group AB from CDE = 0.000000218

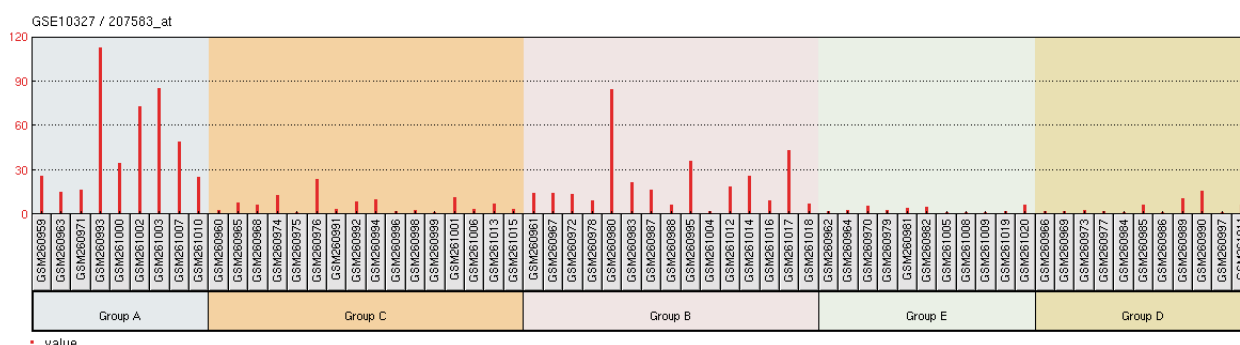

### Probeset 207819\_s\_at: ABCB4

Adj. p-value for discrimination of tumors of group B from ACDE = 0.000000726

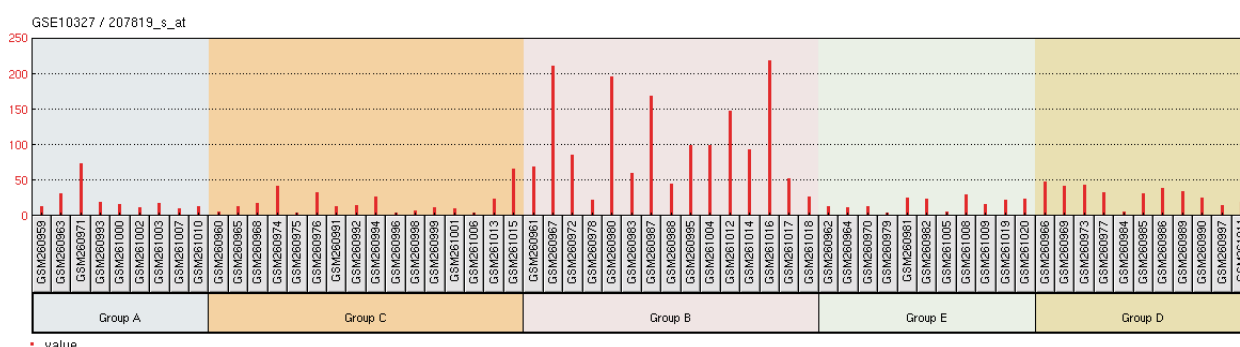

Supplement: MOESM3 [file 9687108]
